# Supplementary figures and images for: Elaiophylin Inhibits Tumorigenesis of Human Lung Adenocarcinoma by Inhibiting Mitophagy via Suppression of SIRT1/Nrf2 Signaling
Source: MDPI journal article supplement (doi:10.3390/cancers14235812), 2022-11-25

Figure 2C

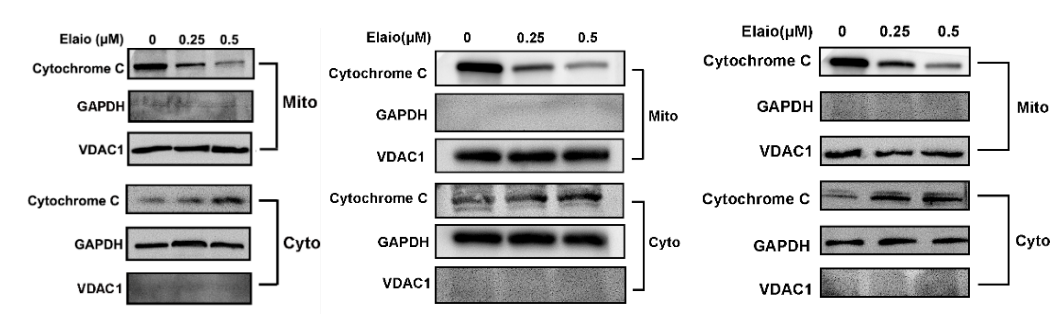

Figure 2F

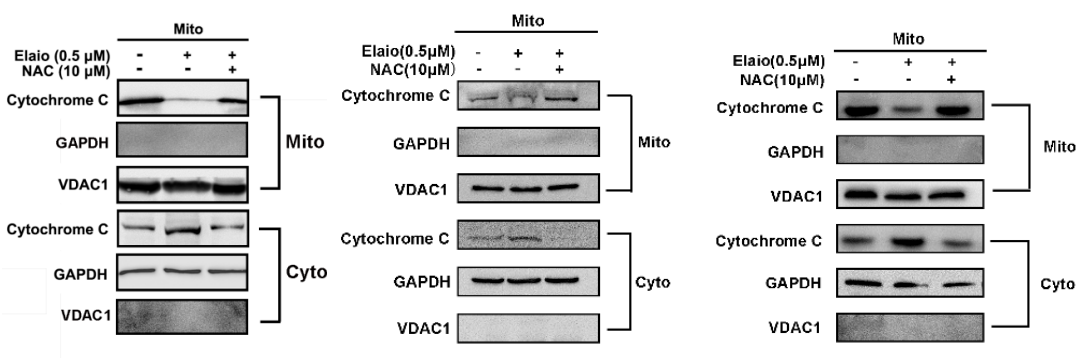

Figure3A

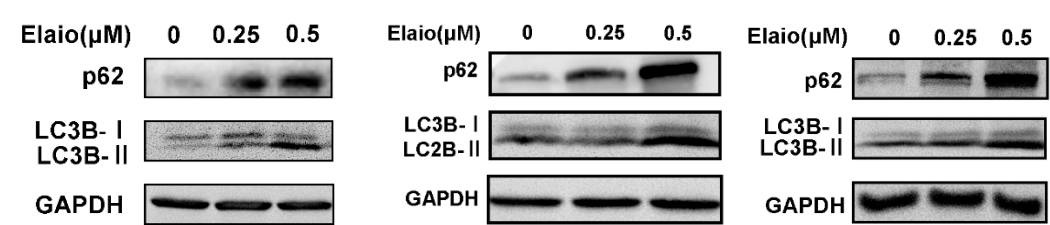

Figure3B

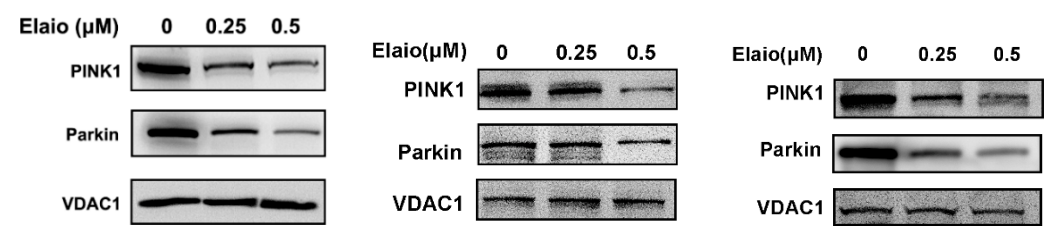

Figure5A

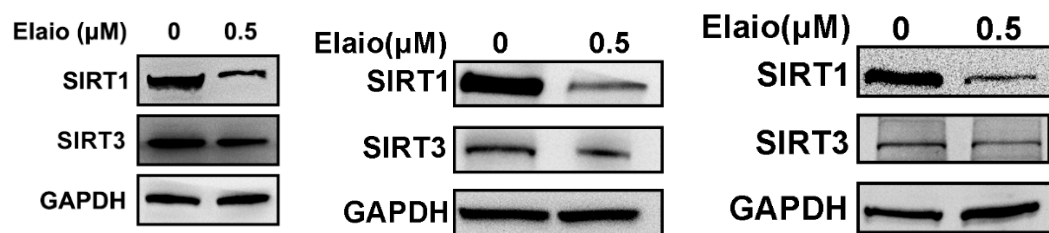

Figure 5B

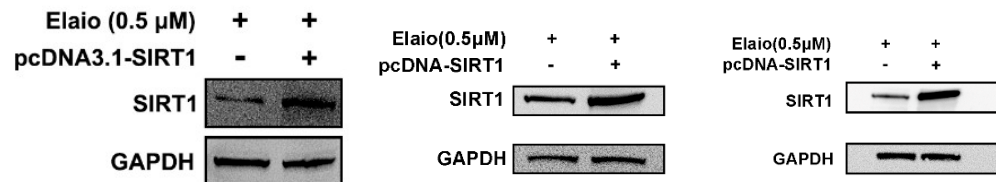

Figure 5D

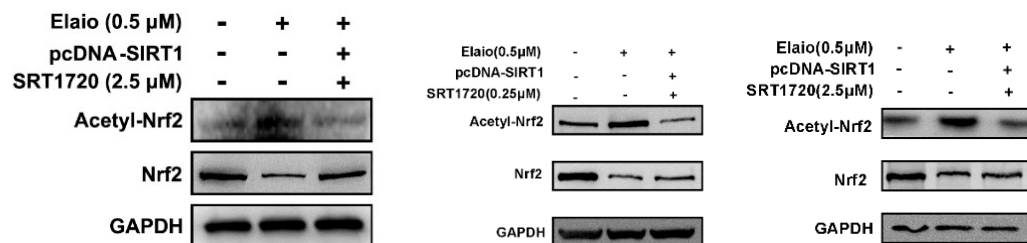

Figure 5E

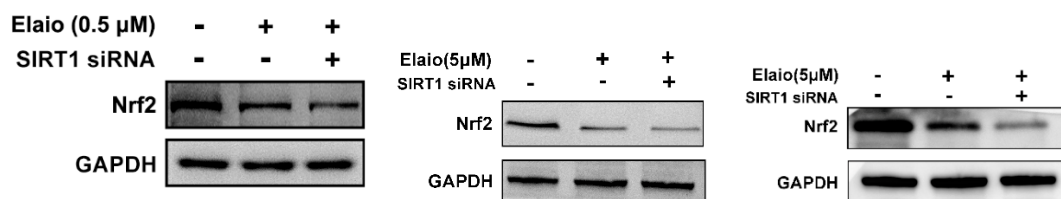

Figure 6A

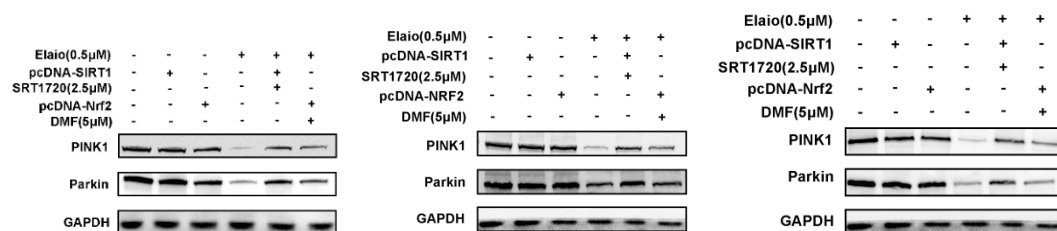

Supplement: s1 [file s1]
